# Supplementary material
Source: PubMed Central journal article supplement (PMC3989626)
Supplement: embj0033-0437-sd2.pdf [file embj0033-0437-sd2.pdf]

Figure 3B – Source Data

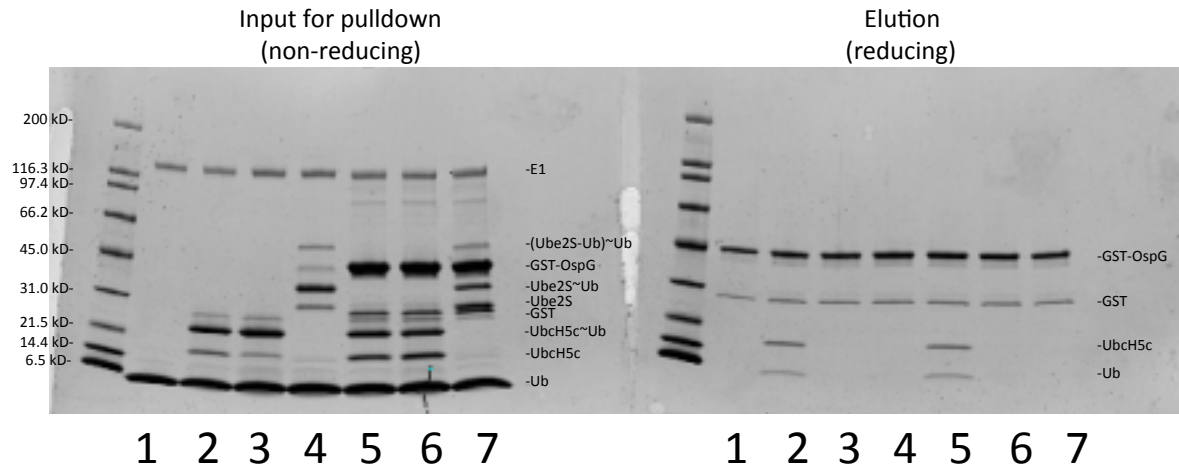

- |                |                                     |
|----------------|-------------------------------------|
| 1- No E2       | (GST-OspG added after charging rxn) |
| 2- WT-UbcH5c   | (GST-OspG added after charging rxn) |
| 3- F62A-UbcH5c | (GST-OspG added after charging rxn) |
| 4- Ube2S       | (GST-OspG added after charging rxn) |
| 5- WT-UbcH5c   | + GST-OspG in rxn mix               |
| 6- F62A-UbcH5c | + GST-OspG in rxn mix               |
| 7- Ube2S       | + GST-OspG in rxn mix               |
