# Supplementary material
Source: PubMed Central journal article supplement (PMC3989626)
Supplement: embj0033-0437-sd6.pdf [file embj0033-0437-sd6.pdf]

**Supplemental Figure 2: OspG localization and *in vitro* pulldowns**

**a)** One representative image from the transfection of YFP-tagged OspG (green) into HeLa cell lines. Cytoskeletal and nuclear stains are also shown for reference. **b)** *In vitro* GST-OspG pulldowns of E2~Ub conjugates. GST-OspG was added to *in vitro* reactions containing E1, E2, Ub, +/- ATP. OspG complexes were purified using GSH affinity resin and samples were loaded onto SDS-PAGE gels in non-reducing sample buffer to preserve the E2~Ub thioester linkage if present. Boxed regions highlight either E2~Ub conjugates (non-reducing SDS Page) or free E2s (reducing SDS-Page). Input (I) samples represent a 100% potential for the Pulldown (P) sample.
