# Supplementary material
Source: PubMed Central journal article supplement (PMC3989626)
Supplement: embj0033-0437-sd9.pdf [file embj0033-0437-sd9.pdf]

Supplemental Figure 5: Sequence and activity comparison of OspG and related effector orthologs

A

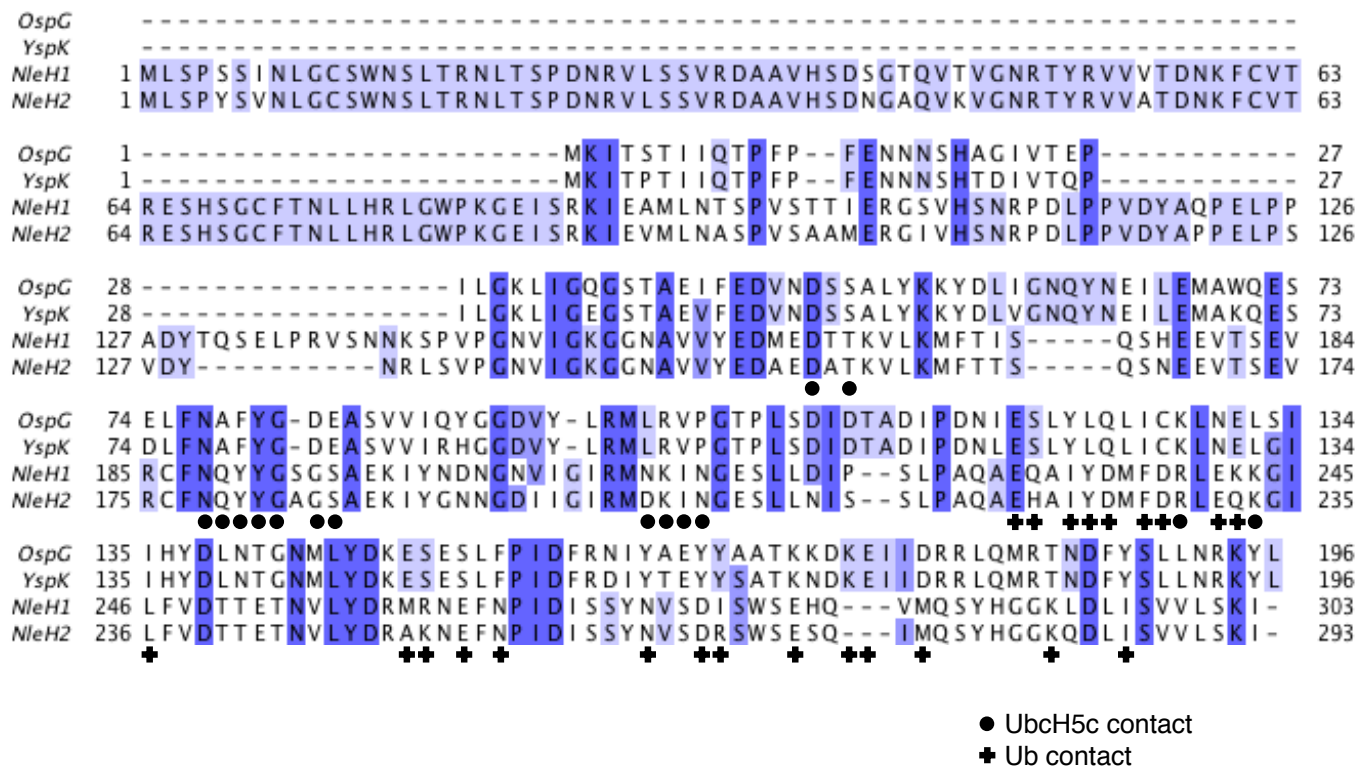

B

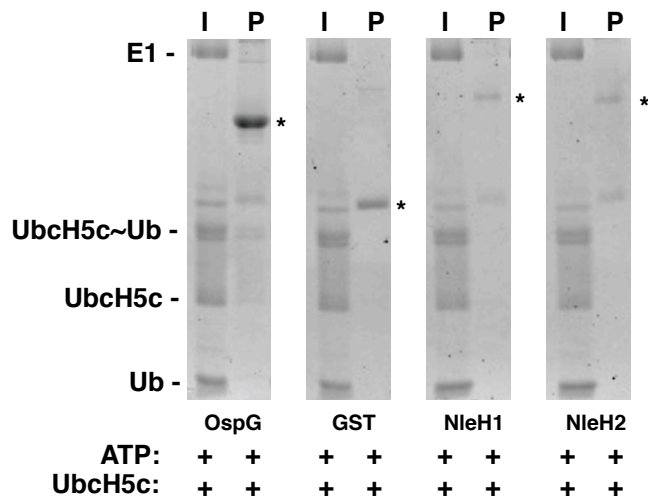

C

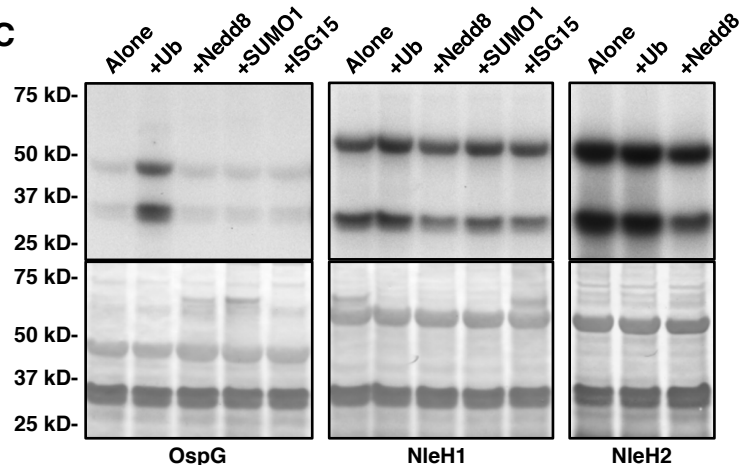

**Supplemental Figure 5: Sequence comparison between OspG and related effector orthologs.**

**a)** Sequence alignment between OspG and the related effector kinases YspK (*Yersinia pestis*), NleH1, and NleH2 (*EHEC Escherichia coli*). Sequences are colored by conservation. Residues involved in the UbcH5c- and Ub-interfaces on OspG are indicated. **b)** Nonreducing pulldowns of UbcH5c~Ub using GST-OspG, GST, GST-NleH1, or GST-NleH2. GST-tagged proteins are indicated by asterisks. **c)**  $\gamma$ <sup>32</sup>P-ATP kinase assay measuring OspG, NleH1, and NleH2 activities against the kinase itself and Histone H1 in response to added Ub or Ubl proteins. Upper: <sup>32</sup>P-autoradiography. Lower: India ink stain for total protein.
