# Supplementary material
Source: PubMed Central journal article supplement (PMC3989626)
Supplement: embj0033-0437-sd10.pdf [file embj0033-0437-sd10.pdf]

Supplemental Figure 6: Bacterial burdens from murine model shigellosis

A

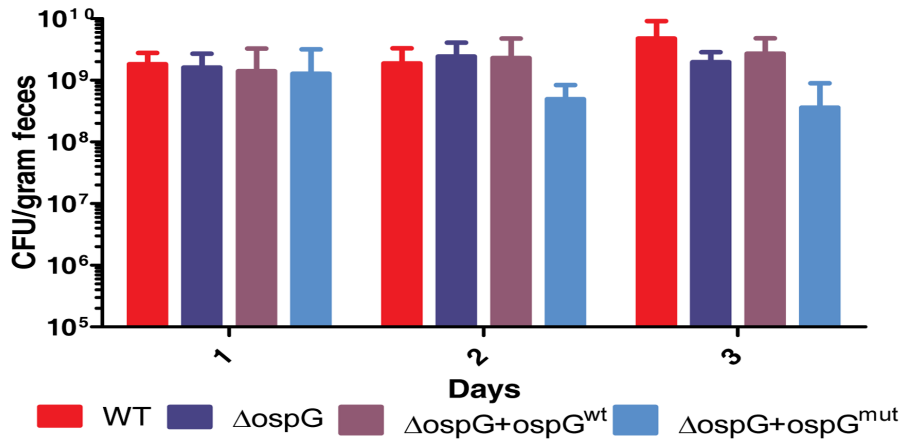

B

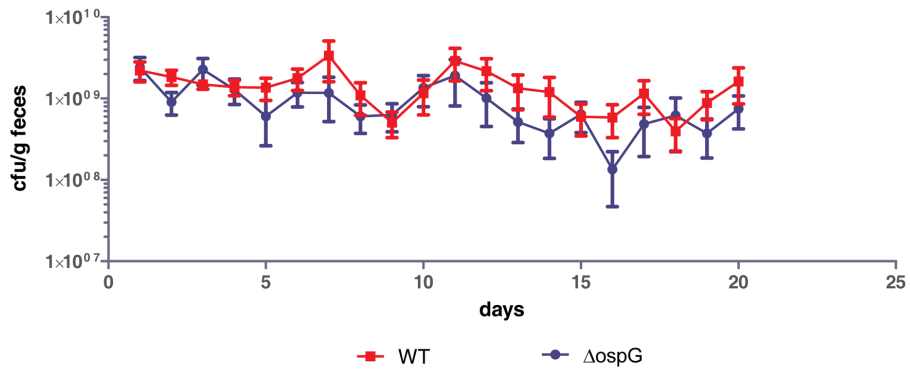

**Supplemental Figure 6: Bacterial burdens from murine model shigellosis.**

**a)** CFU counts in feces collected daily until day 3 post oral infection of BALB/c mice with WT,  $\Delta ospG$ ,  $\Delta ospG+ospG^{wt}$ ,  $\Delta ospG+ospG^{mut}$  *Shigella flexneri* ( $1 \times 10^8$  CFU oral gavage), n=11 per group, p>0.05 **b)** CFU counts in feces collected daily till day 20 post oral infection of BALB/c mice with WT and  $\Delta ospG$  *Shigella flexneri* ( $1 \times 10^8$  CFU oral infection), n=5-14 per group, p>0.05.
