# Supplementary material
Source: PubMed Central journal article supplement (PMC3989626)
Supplement: embj0033-0437-sd11.pdf [file embj0033-0437-sd11.pdf]

Supplemental Figure 7: Effector secretion profile for *S. flexneri* strains.

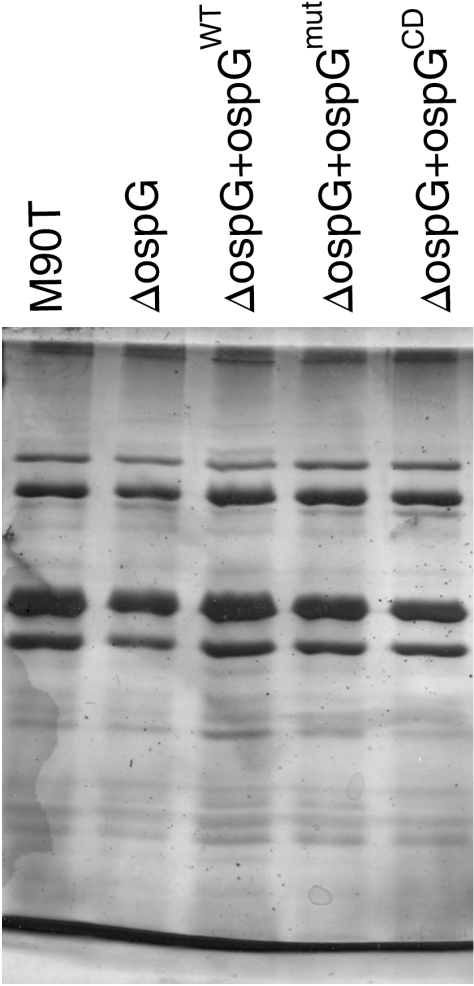

**Supplemental Figure 7. Effector secretion profile for *S. flexneri* strains.** Silver-stained SDS-PAGE gels show the profiles of secreted proteins from the indicated *S. flexneri* wild type strains. The secretion profiles of other *Shigella* effectors are not significantly impacted by the absence or presence of OspG and OspG mutants.
