# Supplementary material
Source: PubMed Central journal article supplement (PMC3989626)
Supplement: embj0033-0437-sd12.pdf [file embj0033-0437-sd12.pdf]

**Supplemental Figure 8: Structural alignment between OspG and RIO kinases**

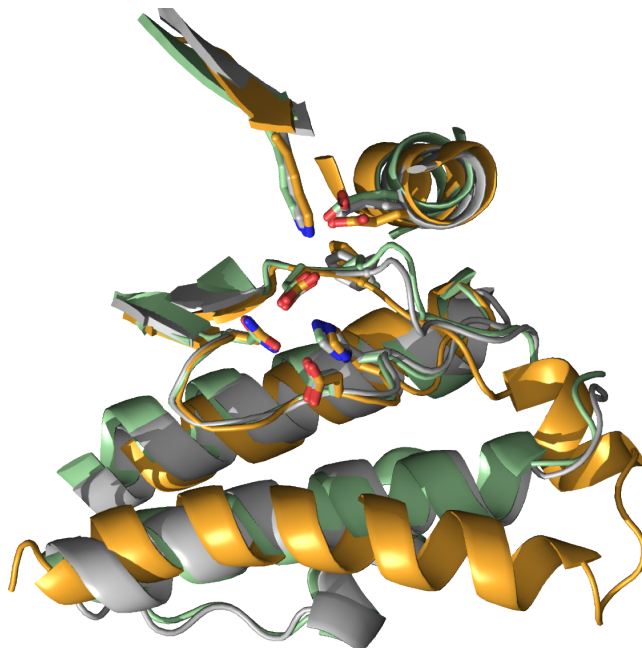

**Supplemental Figure 8. Structural alignment between OspG and RIO kinases.** Structure alignment between OspG (orange) and the RIO1 (green, PDB ID 1ZTH) and RIO2 (grey, PDB ID 1ZAR) kinases from *A. fulgidus*. Key structural and catalytic residues, as shown in Figure 1, are depicted.
