# Supplementary material
Source: PubMed Central journal article supplement (PMC3989626)
Supplement: embj0033-0437-sd13.pdf [file embj0033-0437-sd13.pdf]

**Supplemental Figure 9: Comparison of Ubch5~Ub conformation in OspG/Ubch5~Ub relative to RING and HECT E3/Ubch5~Ub complexes.**

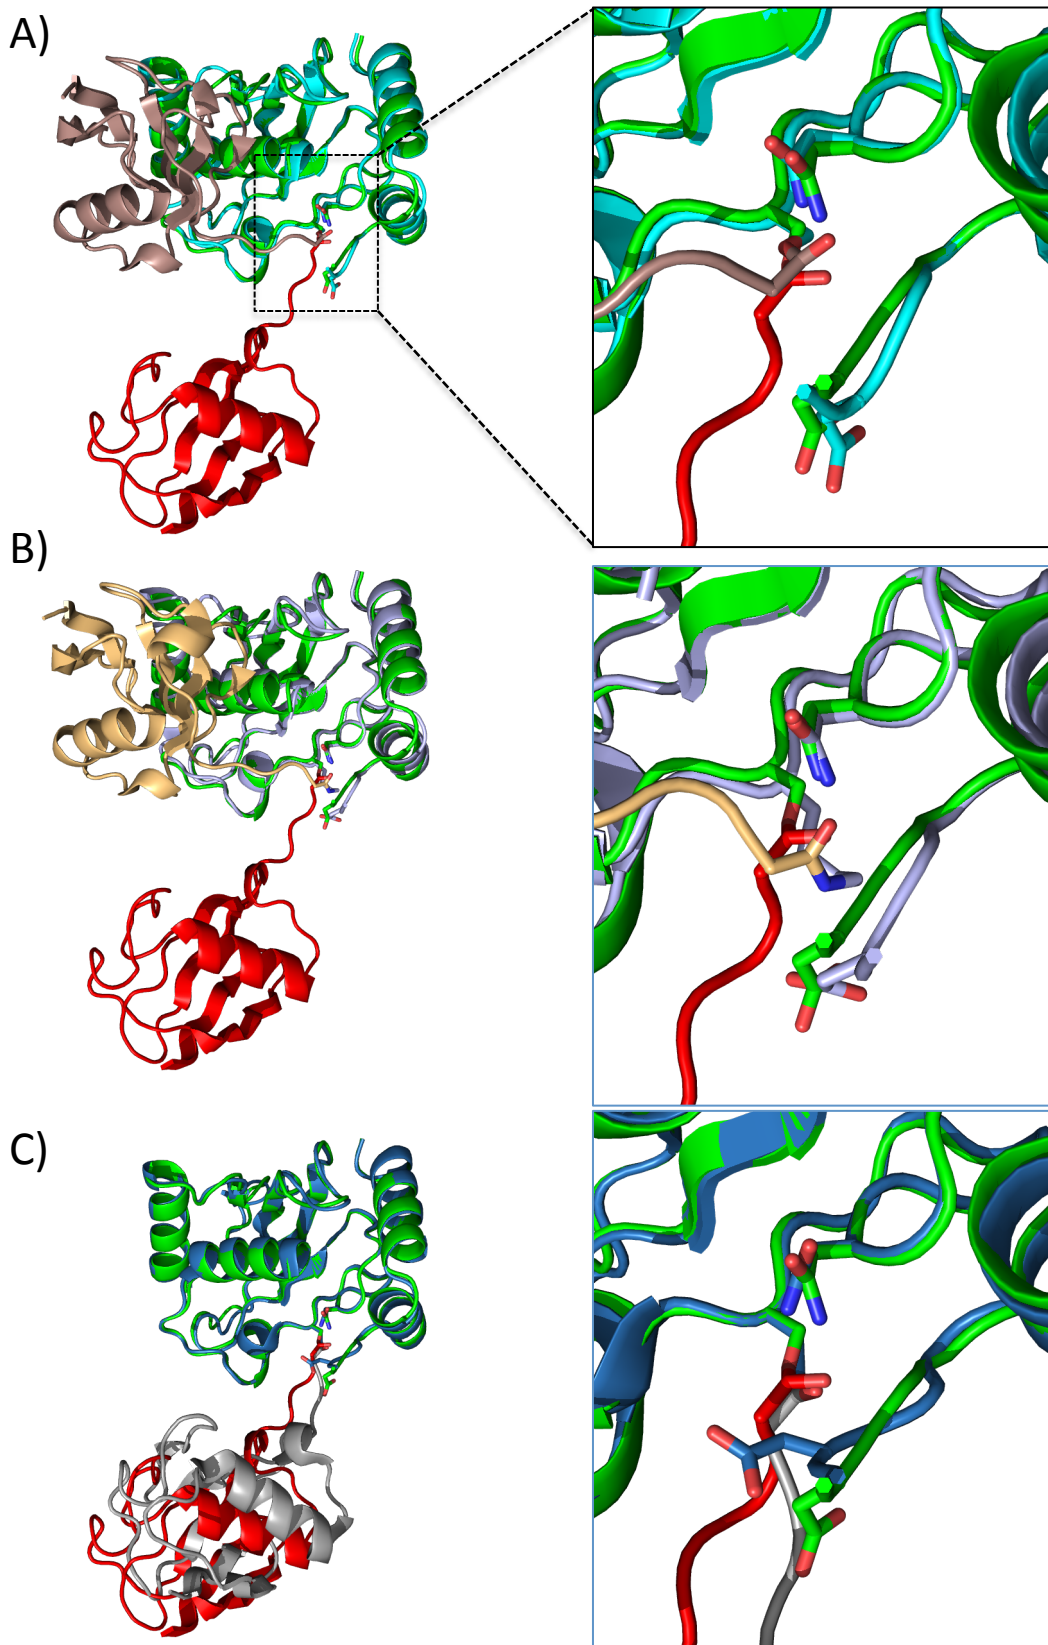

**Supplemental Figure 9. Comparison of UbCH5~Ub conformation in OspG/UbCH5~Ub relative to RING and HECT E3/UbCH5~Ub complexes.** For each panel, the UbCH5 subunit of an UbCH5~Ub conjugate from **(a)** the RING BIRC7/UbCH5b~Ub conjugate complex (PDB ID 4AUQ; Dou et. al. (2012)), **(b)** the RING RNF4/UbCH5a~Ub conjugate complex (PDB ID 4AP4; Plechanovová (2012)), and **(c)** the HECT NEDD4L/UbCH5b~Ub conjugate complex (PDB ID 3JVZ; Kamaduri et. al (2009)) was superposed onto the structure of the UbCH5c~Ub conjugate from the OspG/UbCH5c~Ub complex (PDB ID 4BVU) to compare the relative orientations of Ub subunits (left) and active site residues (right enlargement). For the enlargement, residues P113, N114, and P115 were hidden for an unobstructed view into the E2 active site. Active site UbCH5 residues N77 and D117 side chains are shown in stick representation as well as the active site mutation (S85 for panels A and C, K85 for panel B).
