# Supplementary material
Source: PubMed Central journal article supplement (PMC3989626)
Supplement: embj0033-0437-sd14.pdf [file embj0033-0437-sd14.pdf]

## Supplemental Table 1

| Primer Name                                 | Primer Sequence                                                                                                   |
|---------------------------------------------|-------------------------------------------------------------------------------------------------------------------|
| tet 2F-PstI                                 | GTACTTCTGCAGCTAAGCACTTGTCTCCTG                                                                                    |
| tet 2R-PstI                                 | AGTCTTCTGCAGTTAAGACCCACTTTCACATT                                                                                  |
| P1                                          | ATTCCGGGGATCCGTCGACC                                                                                              |
| P2                                          | TGTAGGCTGGAGCTGCTTCG                                                                                              |
| T3 LR1R-HindIII                             | ATGCTAAAGCTT <u>TGTAGGCTGGAGCTGCTTCG</u> <u>AAGTTCCTATACTTTCTAGAGAATAGGAACTT</u><br><u>CAATTAACCCCTCACTAAAGGG</u> |
| T7 LR1F-KpnI                                | TCGTTAGGTACCATTCCGGGGATCCGTCGACC <u>GAAGTTCCTATTCTCTAGAAAGTATAGGAACT</u><br><u>TCTAATACGACTCACTATAGGG</u>         |
| ospG LR1F                                   | GTGTGAAAATCTCTTGTGATTTTTAAATATCGTAACAAAGGTATGACATGATTCCGGGGATCCG<br>TCGACC                                        |
| ospG LR1R                                   | CCTCTGGCTTATAGCATCAACAAATACGTCTATAAAATATTTCTGTTTAA <u>TGTAGGCTGGAGCT</u><br><u>GCTTCG</u>                         |
| ospG LR2R                                   | TCTGCTGCCGTGATCGCACT                                                                                              |
| <u>OspG fwd</u><br><u>BamHI</u>             | CGCCCCGGATCCATGAAAATAACATCTACCAT                                                                                  |
| <u>OspG rev with</u><br><u>stop XhoI</u>    | CGCCCCCTCGAGCTATAAAATATTTCTGTTTAA                                                                                 |
| <u>OspG rev Flag</u><br><u>no stop XhoI</u> | CGCCCCCTCGAGCTACTTATCATCATCATCCTTGTAATCTAAATATTTCTGTTTAA                                                          |
| SIR C For                                   | AAGCTTCGATCGCTTATCCAGCAGTGGCATCA                                                                                  |
| SIR C Rev                                   | AAGCTTCGATCGTATTGCACCGTTCGTGACAT                                                                                  |

**Supplemental Table 1:** Primer sequences used for the deletion and complementation of *ospG* in *Shigella*.
