# Supplementary material
Source: PubMed Central journal article supplement (PMC3989626)

Figure 5B – Source Data

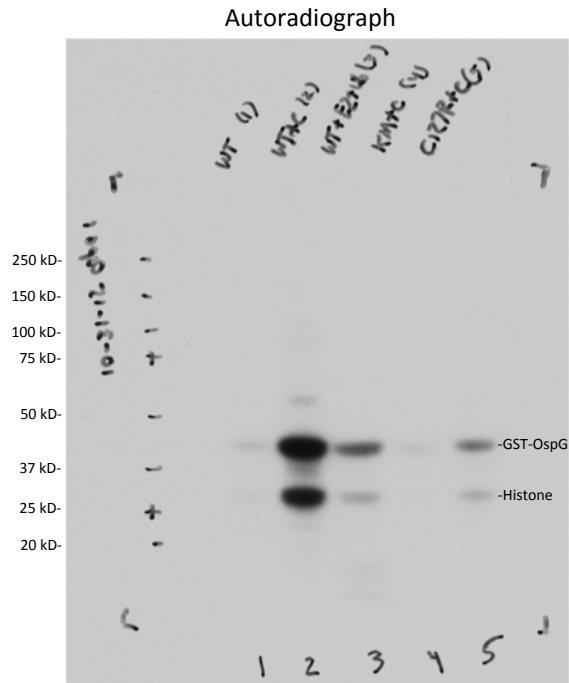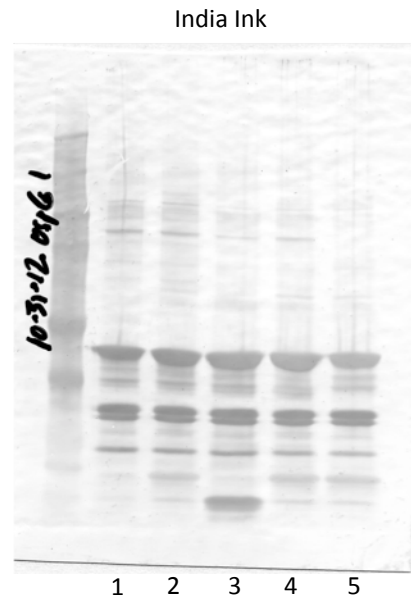

- 1- WT-OspG
- 2- WT-OspG + Ubch5c-O~Ub
- 3- WT-OspG + Ubch5c + Ub
- 4- K33M-OspG + Ubch5c-O~Ub
- 5- C127R-OspG + Ubch5c-O~Ub

Supplement: embj0033-0437-sd3.pdf [file embj0033-0437-sd3.pdf]

Figure 5C – Source Data

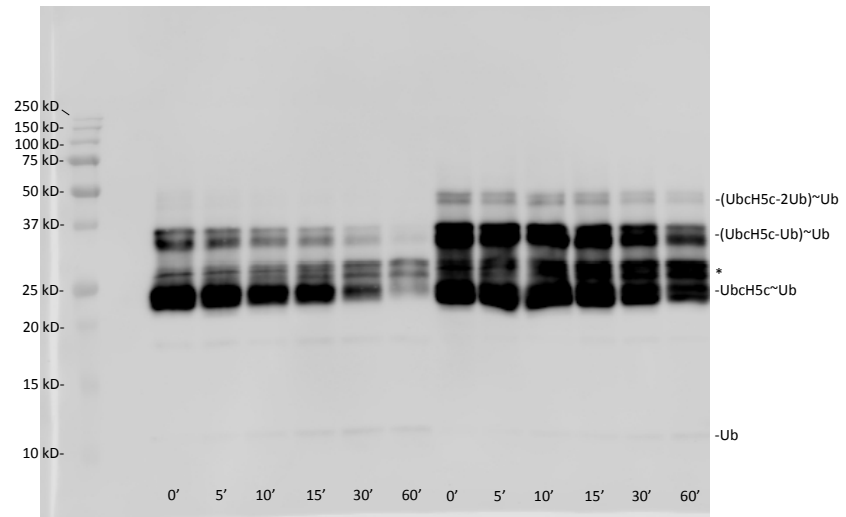

Supplement: embj0033-0437-sd4.pdf [file embj0033-0437-sd4.pdf]
